# Supplementary material
Source: PubMed Central journal article supplement (PMC3913161)

# The Association between Cortisol Characteristics and Neighborhood Disadvantage in a U.S. Population-Based Sample of Adolescents.

## Supplementary Material

KE Rudolph, GS Wand, EA Stuart, TA Glass, AH Marques, R Duncko, KR Merikangas

Table 1: NCS-A sample characteristics in 2001-2004 by cortisol status. Results are combined across imputations and survey design-based standard errors are estimated using Taylor linearization.

| Variable                        | With Cortisol<br>N=2485 |       | Without Cortisol<br>N=7589 |        | P-value<br>(2-sided) |
|---------------------------------|-------------------------|-------|----------------------------|--------|----------------------|
|                                 | Mean                    | SE    | Mean                       | SE     |                      |
| Female, %                       | 49.46                   | 0.97  | 51.61                      | 0.60   | 0.065                |
| Age, y                          | 15.153                  | 0.036 | 15.186                     | 0.032  | 0.248                |
| Race/ethnicity, %               |                         |       |                            |        | 0.710                |
| Hispanic                        | 18.87                   | 1.16  | 18.75                      | 0.83   |                      |
| Black                           | 18.71                   | 1.25  | 19.48                      | 0.95   |                      |
| Other                           | 6.52                    | 0.57  | 6.01                       | 0.34   |                      |
| White                           | 55.90                   | 1.54  | 55.76                      | 1.173  |                      |
| Urbanicity, %                   |                         |       |                            |        | 0.001                |
| Non-urban                       | 23.18                   | 2.20  | 22.73                      | 1.71   |                      |
| Suburb                          | 35.33                   | 1.89  | 31.93                      | 1.46   |                      |
| Urban center                    | 41.49                   | 1.88  | 45.34                      | 1.53   |                      |
| Region, %                       |                         |       |                            |        | <0.001               |
| Northeast                       | 16.42                   | 1.43  | 18.94                      | 1.20   |                      |
| Midwest                         | 25.15                   | 1.80  | 28.32                      | 1.50   |                      |
| South                           | 36.78                   | 2.04  | 33.05                      | 1.53   |                      |
| West                            | 21.65                   | 1.48  | 19.70                      | 1.14   |                      |
| Household income (log), dollars | 11.106                  | 0.026 | 11.188                     | 0.0167 | 0.005                |
| Maternal age at birth, y        | 26.034                  | 0.128 | 26.049                     | 0.086  | 0.463                |
| Maternal level of education, %  |                         |       |                            |        | 0.012                |
| Less than high school           | 10.78                   | 1.10  | 8.79                       | 0.45   |                      |
| High school graduate            | 43.53                   | 1.12  | 43.66                      | 0.69   |                      |
| Some college                    | 24.00                   | 1.02  | 23.95                      | 0.60   |                      |
| College graduate                | 21.69                   | 1.06  | 23.59                      | 0.64   |                      |
| Maternal work history, %        |                         |       |                            |        | 0.461                |
| All of adolescent's life        | 48.31                   | 1.05  | 49.53                      | 0.66   |                      |
| Most of adolescent's life       | 21.94                   | 0.84  | 20.73                      | 0.46   |                      |
| Some of adolescent's life       | 14.98                   | 0.73  | 14.15                      | 0.43   |                      |
| A little of adolescent's life   | 7.09                    | 0.54  | 7.41                       | 0.32   |                      |
| Not at all                      | 7.68                    | 0.57  | 8.17                       | 0.35   |                      |

Continued on next page

Table 1 – continued from previous page

| Variable                                | With Cortisol |       | Without Cortisol |       | P-value |
|-----------------------------------------|---------------|-------|------------------|-------|---------|
| Paternal work history, %                |               |       |                  |       | 0.867   |
| All of adolescent's life                | 77.29         | 1.05  | 76.72            | 0.64  |         |
| Most of adolescent's life               | 13.03         | 0.83  | 13.71            | 0.44  |         |
| Some of adolescent's life               | 6.20          | 0.62  | 5.99             | 0.33  |         |
| A little of adolescent's life           | 2.16          | 0.37  | 2.08             | 0.24  |         |
| Not at all                              | 1.32          | 0.29  | 1.49             | 0.19  |         |
| Parental current employment, %          | 72.91         | 4.57  | 75.08            | 0.81  | 0.033   |
| Family structure, %                     |               |       |                  |       |         |
| Lived with mother whole life            | 87.70         | 0.68  | 86.83            | 0.42  | 0.276   |
| Lived with father whole life            | 57.20         | 1.12  | 56.16            | 0.74  | 0.378   |
| Citizen, %                              | 95.90         | 0.44  | 95.63            | 0.27  | 0.604   |
| English as second language, %           | 20.60         | 1.09  | 19.86            | 0.77  | 0.437   |
| Immigrant generation, %                 |               |       |                  |       | 0.519   |
| 1st                                     | 5.98          | 0.56  | 5.88             | 0.34  |         |
| 2nd                                     | 12.27         | 0.80  | 13.16            | 0.55  |         |
| 3rd or greater                          | 81.74         | 1.02  | 80.96            | 0.73  |         |
| Small for gestational age, %            | 6.45          | 0.67  | 5.33             | 0.42  | 0.040   |
| Current smoker, %                       | 5.72          | 0.48  | 7.29             | 0.35  | 0.009   |
| Current drug user, %                    | 5.51          | 0.47  | 6.01             | 0.31  | 0.389   |
| Current oral contraceptive user, %      | 3.66          | 0.37  | 4.59             | 0.27  | 0.057   |
| No. Rx                                  | 0.4348        | 0.020 | 0.4559           | 0.012 | 0.188   |
| Typical bedtime,hr                      |               |       |                  |       |         |
| Weekday                                 | 00:22         | 00:02 | 00:19            | 00:02 | 0.617   |
| Weekend                                 | 22:26         | 00:02 | 22:25            | 00:01 | 0.850   |
| Typical hours of sleep,hr               |               |       |                  |       |         |
| Weekday                                 | 7.672         | 0.030 | 7.676            | 0.018 | 0.460   |
| Weekend                                 | 8.845         | 0.044 | 8.851            | 0.027 | 0.454   |
| Physical abuse by parent, %             | 12.30         | 0.69  | 12.74            | 0.45  | 0.594   |
| Three or more parental adversities, %   | 3.70          | 0.39  | 3.83             | 0.24  | 0.811   |
| Disadvantaged neighborhood residence, % | 38.07         | 2.02  | 35.37            | 1.53  | 0.016   |
| Cortisol sample measurements            |               |       |                  |       |         |
| Season, %                               |               |       |                  |       | <0.001  |
| Spring                                  | 10.54         | 0.89  | 27.54            | 0.89  |         |
| Summer                                  | 42.05         | 1.32  | 27.99            | 0.80  |         |
| Fall                                    | 33.08         | 1.24  | 24.42            | 0.87  |         |
| Winter                                  | 14.33         | 0.87  | 20.06            | 0.71  |         |
| Weekend, %                              | 29.18         | 0.97  | 29.62            | 0.64  | 0.690   |
| Collection time, hr                     | 14:52         | 00:04 | 15:02            | 00:02 | <0.001  |

Table 2: NCS-A cortisol sample characteristics by CAR sampling time. Results are combined across imputations and survey design-based standard errors are estimated using Taylor linearization.

| Variable                        | During CAR<br>N=449 |       | Post-CAR<br>N=2036 |       | P-value<br>(2-sided) |
|---------------------------------|---------------------|-------|--------------------|-------|----------------------|
|                                 | Mean                | SE    | Mean               | SE    |                      |
| Female, %                       | 47.66               | 2.33  | 49.85              | 1.07  | 0.430                |
| Age, y                          | 15.116              | 0.073 | 15.161             | 0.038 | 0.290                |
| Race/ethnicity, %               |                     |       |                    |       | 0.497                |
| Hispanic                        | 18.49               | 2.07  | 18.96              | 1.19  |                      |
| Black                           | 20.71               | 2.17  | 18.27              | 1.31  |                      |
| Other                           | 7.35                | 1.23  | 6.34               | 0.62  |                      |
| White                           | 53.45               | 2.61  | 56.43              | 1.61  |                      |
| Urbanicity, %                   |                     |       |                    |       | 0.063                |
| Urban center                    | 22.72               | 2.88  | 23.28              | 2.24  |                      |
| Suburb                          | 31.18               | 2.70  | 36.25              | 1.98  |                      |
| Non-urban                       | 46.10               | 2.92  | 40.47              | 1.92  |                      |
| Region, %                       |                     |       |                    |       | 0.705                |
| Northeast                       | 16.48               | 2.16  | 16.40              | 1.47  |                      |
| Midwest                         | 26.73               | 2.55  | 24.80              | 1.87  |                      |
| South                           | 34.52               | 2.96  | 37.28              | 2.10  |                      |
| West                            | 22.27               | 2.30  | 21.51              | 1.53  |                      |
| Household income (log), dollars | 11.135              | 0.052 | 11.100             | 0.028 | 0.724                |
| Maternal age at birth, y        | 26.109              | 0.281 | 26.018             | 0.140 | 0.614                |
| Maternal level of education, %  |                     |       |                    |       | 0.575                |
| Less than high school           | 9.29                | 1.87  | 11.11              | 1.22  |                      |
| High school graduate            | 43.83               | 2.95  | 43.46              | 1.19  |                      |
| Some college                    | 25.81               | 2.33  | 23.61              | 1.13  |                      |
| College graduate                | 21.07               | 2.11  | 21.83              | 1.17  |                      |
| Maternal work history, %        |                     |       |                    |       | 0.729                |
| All of adolescent's life        | 51.29               | 2.42  | 47.65              | 1.16  |                      |
| Most of adolescent's life       | 20.96               | 2.08  | 22.16              | 0.93  |                      |
| Some of adolescent's life       | 13.81               | 1.63  | 15.24              | 0.82  |                      |
| A little of adolescent's life   | 6.84                | 1.21  | 7.14               | 0.59  |                      |
| Not at all                      | 7.10                | 1.22  | 7.81               | 0.65  |                      |
| Paternal work history, %        |                     |       |                    |       | 0.942                |
| All of adolescent's life        | 76.61               | 2.42  | 77.44              | 1.12  |                      |
| Most of adolescent's life       | 13.07               | 1.77  | 13.03              | 0.89  |                      |
| Some of adolescent's life       | 6.19                | 1.28  | 6.20               | 0.67  |                      |
| A little of adolescent's life   | 2.67                | 0.96  | 2.04               | 0.40  |                      |
| Not at all                      | 1.45                | 0.72  | 1.30               | 0.29  |                      |
| Parental current employment, %  | 69.24               | 5.58  | 73.71              | 4.50  | 0.061                |
| Family structure, %             |                     |       |                    |       |                      |
| Lived with mother whole life    | 87.53               | 1.59  | 87.74              | 0.75  | 0.964                |
| Lived with father whole life    | 61.51               | 2.32  | 56.25              | 1.24  | 0.047                |
| Citizen, %                      | 94.88               | 1.07  | 96.12              | 0.50  | 0.285                |
| English as second language, %   | 20.94               | 2.15  | 20.53              | 1.13  | 0.898                |
| Immigrant generation, %         |                     |       |                    |       | 0.858                |

Continued on next page

Table 2 – continued from previous page

| Variable                                | During CAR |       | Post-CAR |       | P-value |
|-----------------------------------------|------------|-------|----------|-------|---------|
| 1st                                     | 6.50       | 1.27  | 5.87     | 0.62  |         |
| 2nd                                     | 11.92      | 1.61  | 12.35    | 0.88  |         |
| 3rd or greater                          | 81.58      | 2.03  | 81.78    | 1.08  |         |
| Small for gestational age, %            | 6.50       | 1.63  | 6.44     | 0.67  | 1.000   |
| Current smoker, %                       | 4.23       | 0.95  | 6.05     | 0.54  | 0.164   |
| Current drug user, %                    | 4.01       | 0.92  | 5.84     | 0.54  | 0.153   |
| Current oral contraceptive user, %      | 4.90       | 1.01  | 3.39     | 0.39  | 0.160   |
| No. Rx                                  | 0.452      | 0.046 | 0.431    | 0.022 | 0.663   |
| Typical bedtime,hr                      |            |       |          |       |         |
| Weekday                                 | 22:42      | 00:04 | 22:44    | 00:02 | 0.427   |
| Weekend                                 | 00:13      | 00:05 | 00:24    | 00:02 | 0.023   |
| Typical hours of sleep, hr              |            |       |          |       |         |
| Weekday                                 | 7.770      | 0.071 | 7.650    | 0.032 | 0.939   |
| Weekend                                 | 8.868      | 0.102 | 8.839    | 0.047 | 0.602   |
| Physical abuse by parent, %             | 10.47      | 1.54  | 12.71    | 0.75  | 0.220   |
| Three or more parental adversities, %   | 2.00       | 0.66  | 4.08     | 0.45  | 0.049   |
| Disadvantaged neighborhood residence, % | 38.53      | 3.00  | 37.97    | 2.07  | 0.866   |
| Cortisol sample measurements            |            |       |          |       |         |
| Season, %                               |            |       |          |       | <0.001  |
| Spring                                  | 7.80       | 1.36  | 11.15    | 1.00  |         |
| Summer                                  | 57.46      | 2.47  | 38.65    | 1.40  |         |
| Fall                                    | 24.72      | 2.21  | 34.92    | 1.33  |         |
| Winter                                  | 10.02      | 1.46  | 15.28    | 0.94  |         |
| Weekend, %                              | 56.12      | 2.47  | 23.23    | 0.98  | <0.001  |
| Collection time, hr                     | 10:12      | 00:03 | 15:54    | 00:04 | <0.001  |

Table 3: Conditional expected ratios in cortisol levels and conditional expected differences in slope (ng/mL/hr  $10^{-2}$ ) during the late decline portion of cortisol’s circadian rhythm comparing adolescents living in disadvantaged versus non-disadvantaged neighborhoods under different exclusion criteria.

| <b>Model</b>                                                 | <b>Pre</b><br>Mean (95% CI) | <b>Post</b><br>Mean (95% CI) | <b>Rate</b><br>Mean (95% CI) |
|--------------------------------------------------------------|-----------------------------|------------------------------|------------------------------|
| <b>Current smokers and drug users excluded</b>               |                             |                              |                              |
| Unadjusted                                                   | 1.07 (1.00, 1.15)           | 1.01 (0.93, 1.09)            | -0.75 (-1.60, 0.11)          |
| Model 1                                                      | 1.19 (1.05, 1.34)           | 0.96 (0.85, 1.07)            | -2.47 (-4.13, -0.81)         |
| Model 2                                                      | 1.15 (1.00, 1.31)           | 0.96 (0.86, 1.07)            | -2.38 (-4.14, -0.61)         |
| Model 3                                                      | 1.13 (0.99, 1.28)           | 0.95 (0.85, 1.06)            | -2.20 (-3.87, -0.52)         |
| <b>Current smokers excluded, current drug users included</b> |                             |                              |                              |
| Unadjusted                                                   | 1.07 (1.00, 1.15)           | 1.00 (0.92, 1.09)            | -0.78 (-1.59, 0.03)          |
| Model 1                                                      | 1.16 (1.01, 1.33)           | 0.94 (0.84, 1.07)            | -2.30 (-3.89, -0.72)         |
| Model 2                                                      | 1.13 (0.97, 1.32)           | 0.95 (0.85, 1.06)            | -2.21 (-3.95, -0.47)         |
| Model 3                                                      | 1.11 (0.95, 1.28)           | 0.94 (0.84, 1.05)            | -2.03 (-3.68, -0.38)         |
| <b>Current smokers and drug users included</b>               |                             |                              |                              |
| Unadjusted                                                   | 1.06 (1.00, 1.13)           | 1.02 (0.94, 1.11)            | -0.56 (-1.29, 0.18)          |
| Model 1                                                      | 1.11 (0.96, 1.27)           | 0.96 (0.84, 1.10)            | -1.77 (-3.36, -0.18)         |
| Model 2                                                      | 1.08 (0.92, 1.26)           | 0.97 (0.86, 1.10)            | -1.62 (-3.34, 0.10)          |
| Model 3                                                      | 1.06 (0.92, 1.23)           | 0.96 (0.86, 1.08)            | -1.44 (-3.14, 0.27)          |

**Sensitivity Analysis for an Unobserved Confounder** This section presents estimates of the influence of an unobserved confounder. We used a bias equation described in VanderWeele and Arah for average effect differences for those with versus without the exposure, conditional on a vector of confounding variables,  $\mathbf{X}$ . We made the following three simplifying assumptions as discussed by VanderWeele and Arah: (1) the association between the outcome and unobserved confounder is consistent across levels of exposure and observed covariates; (2) the unobserved confounder is binary; and (3) the difference in the prevalence of the unobserved confounder in the exposed versus unexposed is constant across levels of the covariates. Let  $A$  denote the exposure received by an adolescent. In this study,  $a1$  represents residence in a disadvantaged neighborhood and  $a0$  represents residence in a non-disadvantaged neighborhood. Let  $Y$  denote the observed outcome, cortisol rate of change. Let  $\mathbf{X}$  denote the observed covariates, and let  $U$  denote the unobserved binary confounder.

Under the above three simplifying assumptions, the bias of the estimated effect is:

$$d(x) = \delta\gamma$$

where

$$\delta = P(U = 1|a1, \mathbf{X}) - P(U = 1|a0, \mathbf{X}) \text{ and } \gamma = E(Y|a, \mathbf{X}, U = 1) - E(Y|a, \mathbf{X}, U = 0)$$

We calculated the bias and resulting corrected lower 95% confidence bound across an array of input parameter values. We allowed  $\gamma$  to range from 0 to 0.18. We allowed  $\delta$ , the difference in prevalence of the unobserved confounder between exposed and unexposed groups, to range from 5 to 25%.

Figure 1, below, plots the corrected lower 95% CI bound (on the y-axis) against the value of  $\gamma$  (on the x-axis). The different colored curves in each subplot show the relationship for different values of  $\delta$ . Each of the three subplots corresponds to the three adjusted models used in the study (see Figure 2 in the manuscript text). For Adjusted Model 1 and setting  $\delta=0.2$ ,  $\gamma$  would have to be at least 0.04 to render our estimate of the average difference in cortisol slope between disadvantaged and nondisadvantaged neighborhoods nonsignificant. Put another way, the presence of an unobserved confounder would have to change the conditional mean

cortisol slope by 98% to render the effect non-significant.

Including possible mediators in the model makes the effect estimate more sensitive to an unobserved confounder. For example, in Adjusted Models 2 and 3,  $\gamma$  would need to be greater than 0.03 and 0.026 (an increase of 74% and 64% over the conditional mean cortisol slope), respectively.

Figure 1: Corrected lower 95% confidence bound by values of  $\delta$  and  $\gamma$

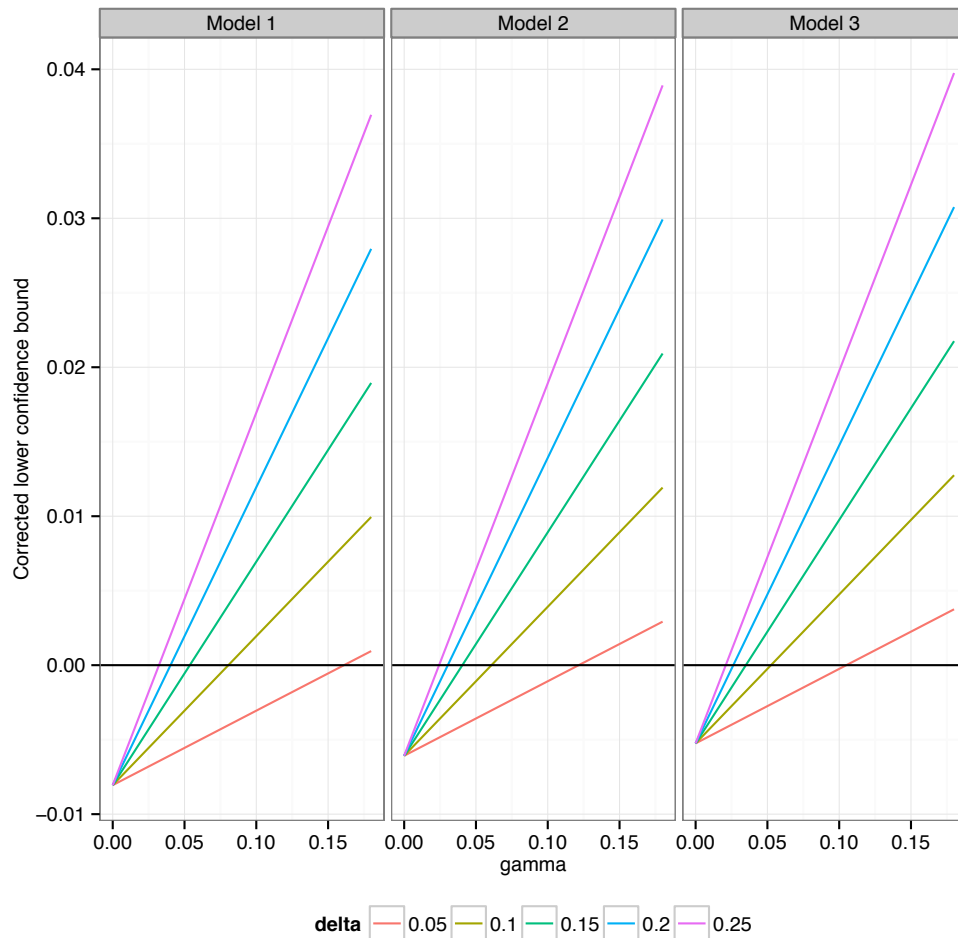

Supplement: NIHMS543145-supplement-01.pdf [file NIHMS543145-supplement-01.pdf]
